# Supplementary material
Source: PubMed Central journal article supplement (PMC4201861)
Supplement: NIHMS593660-supplement-supplement_1.pdf [file NIHMS593660-supplement-supplement_1.pdf]

Figure 1b:

|                                                  | <b>-ATP</b> |      | <b>+ATP</b> |      |
|--------------------------------------------------|-------------|------|-------------|------|
|                                                  | 381         | DPG3 | 381         | DPG3 |
| Pro-IL-1 $\beta$<br>Fold increase/ $\beta$ Actin | 1           | 1.17 | 0.52        | 0.29 |
| Supernatant<br>Arbitrary Units                   | -           | -    | 1           | 1.89 |

Figure 1d:

|                                                  | <b>-ATP</b> |      | <b>+ATP</b> |      |      |      |
|--------------------------------------------------|-------------|------|-------------|------|------|------|
|                                                  | 381         | DPG3 | <b>+KCl</b> |      | 381  | DPG3 |
|                                                  | 381         | DPG3 | 381         | DPG3 | 381  | DPG3 |
| Pro-IL-1 $\beta$<br>Fold increase/ $\beta$ Actin | 1           | 1.06 | 0.18        | 0.10 | 1.06 | 1.08 |
| Supernatant<br>Arbitrary Units                   | -           | -    | 1           | 1.39 | 0.15 | 0.68 |

Figure 1f:

|                                                  | <b>-ATP</b> |      | <b>+ATP</b> |      |      |      |
|--------------------------------------------------|-------------|------|-------------|------|------|------|
|                                                  | 381         | DPG3 | <b>+BEL</b> |      | 381  | DPG3 |
|                                                  | 381         | DPG3 | 381         | DPG3 | 381  | DPG3 |
| Pro-IL-1 $\beta$<br>Fold increase/ $\beta$ Actin | 1           | 1.04 | 0.62        | 0.52 | 0.69 | 0.52 |
| Supernatant<br>Arbitrary Units                   | -           | -    | 1           | 1.41 | -    | -    |

Figure 4b:

|                                                  | <b>-ATP</b> |      |          | <b>+ATP</b> |      |          |
|--------------------------------------------------|-------------|------|----------|-------------|------|----------|
|                                                  | 381         | DPG3 | DPG3+Fim | 381         | DPG3 | DPG3+Fim |
| Pro-IL-1 $\beta$<br>Fold increase/ $\beta$ Actin | 1           | 1.90 | 2.23     | 0.93        | 0.49 | 1.84     |
| Supernatant<br>Arbitrary Units                   | -           | -    | -        | 1           | 1.84 | 1.15     |

Figure 4c:

|                                                  | <b>-ATP</b> |      |          | <b>+ATP</b> |      |          |
|--------------------------------------------------|-------------|------|----------|-------------|------|----------|
|                                                  | 381         | DPG3 | DPG3+Fim | 381         | DPG3 | DPG3+Fim |
| Pro-IL-1 $\beta$<br>Fold increase/ $\beta$ Actin | 1           | 1.18 | 1.76     | 1.04        | 1.03 | 1.49     |
| Supernatant<br>Arbitrary Units                   | -           | -    | -        | -           | -    | -        |

Figure 4d:

|                                               | <b>-ATP</b> |      |      | <b>+ATP</b> |       |       |
|-----------------------------------------------|-------------|------|------|-------------|-------|-------|
|                                               | Medium      | 381  | DPG3 | Medium      | 381   | DPG3  |
| Pro-Caspase-1<br>Fold increase/ $\beta$ Actin | 1           | 0.91 | 0.68 | 1.17        | 0.61  | 0.44  |
| Caspase-1<br>Fold increase/ $\beta$ Actin     | -           | 1    | 1.98 | -           | 22.34 | 36.40 |
